# Supplementary material for: Organic matter dynamics along a salinity gradient in Siberian steppe soils
Source: Copernicus journal article supplement (doi:10.5194/bg-15-13-2018), 2018-01-03
Supplement: Supplementary file 1 [file bg-15-13-2018-supplement.zip]

Archive with 3 entries (3 files):
- bg-15-13-2018-supplement-title-page.pdf
- bg-2017-53-supplement-version4.pdf
- data.xlsx
