# Supplementary material for: Organic matter dynamics along a salinity gradient in Siberian steppe soils
Source: Copernicus journal article supplement (doi:10.5194/bg-15-13-2018), 2018-01-03
Supplement: Supplementary file 1 [file bg-15-13-2018-supplement.zip › bg-15-13-2018-supplement-title-page.pdf]

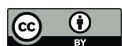

## *Supplement of*

# **Organic matter dynamics along a salinity gradient in Siberian steppe soils**

**Norbert Bischoff et al.**

*Correspondence to:* Norbert Bischoff ([bischoff@ifbk.uni-hannover.de](mailto:bischoff@ifbk.uni-hannover.de))

- [bg-15-13-2018-supplement-title-page.pdf](#)
- [bg-2017-53-supplement-version4.pdf](#)
- [data.xlsx](#)

The copyright of individual parts of the supplement might differ from the CC BY 3.0 License.
