# Supplementary material for: Organic matter dynamics along a salinity gradient in Siberian steppe soils
Source: Copernicus journal article supplement (doi:10.5194/bg-15-13-2018), 2018-01-03
Supplement: Supplementary file 1 [file bg-15-13-2018-supplement.zip › data.xlsx]

## Sheet: data
ID_site	site	ID_plot	plot	Soil_type	Soil_type2	sample location	sample location_Nr	ID_sample location	Hor_Nr	ID_Hor	Hor_Name	Hor_sub	Hor_sub3	L_Edge	Hor_depth_center	Depth	Depth_1m	Moist_2	Moist_3	BD	pH1:2,5 (H2O)	EC1:5	Cl_µmolwater soluble1:5	SO4_µmolwater soluble1:5	NO3_µmolwater soluble1:5	Na_µmolwater soluble1:5	K_µmolwater soluble1:5	Mg_µmolwater soluble1:5	Ca_µmolwater soluble1:5	SAR1:5	CaCO3	Clay	Silt	Sand	Fe Oxal	Fe Dith	Fe Oxal/Dith	C14_POM	C14_err_POM	C14_MOM	C14_err_MOM	OC	TN	C_N_ratio	SOC_stock	SOC_stock_1m	d13C	POM_soil	MOM_calc
Unit														cm	cm	cm	cm	wet (gravim water content % per wet soil)	dry (gravim water content % per wet soil)	g/cm³		µS/cm	µmol/g	µmol/g	µmol/g	µmol/g	µmol/g	µmolc/g	µmolc/g		%	%	%	%	mg/g	mg/g	-	pMC (%)	err (%)	pMC (%)	err (%)	%	%		Mg/ha	Mg/ha	[‰]	% of bulk soil	% of bulk soil
20	NAS 1	50	NAS 1A	Calcic Kastanozem	Kastanozem	profile		5000	1	5001	Ah1	A	Ah	13	6.5	13	13	3.87389	4.03008	1.3398	6.84	37.9	1.09535	0.0719121	0	0.847352	0.548532	0.314977	0.852572	0.350658	0.0435821	13.1836	22.5509	64.2656	0.00731514	4.95981	0.00147488	104.02	0.31	93.73	0.22	1.17281	0.114926	10.2049	20.4273	20.4273	-24.65	0.954464	99.0455
20	NAS 1	50	NAS 1A	Calcic Kastanozem	Kastanozem	profile		5000	2	5002	Ah2	A	Ah	23	18	10	10	4.07858	4.25283	1.37297	7.53	24.1	1.07066	0.00760258	0.0687429	1.23422	0.457628	0.202632	0.555257	0.63394	0.0438368	14.8642	23.8	61.3358	0.00618582	4.84159	0.00127764	104.88	0.23	81.99	0.22	0.707199	0.0788864	8.96478	9.70961	9.70961	-23.9014	0.264016	99.736
20	NAS 1	50	NAS 1A	Calcic Kastanozem	Kastanozem	profile		5000	3	5003	AC	AC	AC	45	34	22	22	4.59886	4.82157	1.45013	7.81	25.8	1.08124	0.00760258	0.0783444	0.521596	0.413661	0.127583	0.385875	0.325497	0.0485017	18.3986	19.7004	61.901	0.00460222	4.5911	0.00100242	103.92	0.23	70.84	0.19	0.550722	0.0642009	8.5781	17.5696	17.5696	-23.6284	0.161666	99.8383
20	NAS 1	50	NAS 1A	Calcic Kastanozem	Kastanozem	profile		5000	4	5004	Ck	C	Ck	70	57.5	25	25	5.37391	5.6849	1.44663	8.71	81.6	1.05205	0.0381691	0.0664031	0.502349	0.514319	0.547173	2.52594	0.128147	7.48413	14.1779	19.1471	66.675	0.00155363	3.43594	0.00045217	101.8	0.22	80.76	0.2	0.355415	0.0400194	8.88108	12.8539	12.8539	-23.6404	0.0734523	99.9265
20	NAS 1	50	NAS 1A	Calcic Kastanozem	Kastanozem	profile		5000	5	5005	Cck	C	Ck	83	76.5	13	13	6.07721	6.47046	1.35447	8.8	100.1	1.03145	0.20527	0	2.66067	0.216868	0.912411	1.45093	0.773822	16.3126	21.0513	30.4018	48.5469	0.000877639	3.91984	0.000223896					0.375856	0.0435707	8.62636	6.61811	6.61811	-23.7513
20	NAS 1	50	NAS 1A	Calcic Kastanozem	Kastanozem	profile		5000	6	5006	2C'k	C	Ck	120	101.5	37	17	2.25425	2.30638	1.54097	9.03	79.2	1.15148	0.282493	0.0534129	0.600027	0.177	0.946069	1.14837	0.185364	3.00983	6.99226	7.12419	85.8836	0.00149613	2.9709	0.000503597					0.121592			6.93264	3.18527
20	NAS 1	50	NAS 1A	Calcic Kastanozem	Kastanozem	increment	w	5050	1	5051
20	NAS 1	50	NAS 1A	Calcic Kastanozem	Kastanozem	increment	x	5060	1	5061
20	NAS 1	50	NAS 1A	Calcic Kastanozem	Kastanozem	plant_shoot	p1	5090	1	5091																																40.7338	0.686957	59.2959			-23.5594
20	NAS 1	50	NAS 1A	Calcic Kastanozem	Kastanozem	plant_shoot	p2	5090	2	5092																																39.7786	1.80915	21.9874			-26.978
20	NAS 1	50	NAS 1A	Calcic Kastanozem	Kastanozem	plant_root	p3	5090	3	5093																																38.4502	0.884577	43.4674			-26.6027
20	NAS 1	50	NAS 1A	Calcic Kastanozem	Kastanozem	plant_lichen	p4	5090	4	5094																																35.2389	0.815862	43.1923			-24.8382
20	NAS 1	51	NAS 1B	Haplic Kastanozem	Kastanozem	profile		5100	1	5101	Ah	A	Ah	21	10.5	21	21	3.43872	3.5612	1.58663	6.95	24.2	1.09944	0.0365028	0.0428433	0.679662	0.460314	0.182164	0.409224	0.395185	0.0917726	11.5777	19.4969	68.9254	0.00881861	4.77193	0.00184802					0.856218	0.0896425	9.60947	28.5286	28.5286	-24.6472	0.476401	99.5236
20	NAS 1	51	NAS 1B	Haplic Kastanozem	Kastanozem	profile		5100	2	5102	AC	AC	AC	54	37.5	33	33	4.37257	4.57425	1.64963	7.78	25.2	1.10818	0.0363466	0.0756011	0.896914	0.194389	0.243112	0.749368	0.402584	0.0823955	15.6884	17.5745	66.7371	0.00447787	5.08734	0.0008802					0.481787	0.0639794	7.63193	26.2275	26.2275	-24.0635	0.128372	99.8716
20	NAS 1	51	NAS 1B	Haplic Kastanozem	Kastanozem	profile		5100	3	5103	Ck	C	Ck	99	76.5	45	45	2.87464	2.96002	1.71363	8.7	171.6	3.62172	0.944699	0.0524447	2.63998	0.105324	0.977225	1.77326	0.71174	2.84503	7.18283	7.81661	85.0006	0.00116445	2.6306	0.000442654					0.149359	0.0219793	6.79542	11.5176	11.5176		0.100841	99.8992
20	NAS 1	51	NAS 1B	Haplic Kastanozem	Kastanozem	profile		5100	4	5104	C	C	C	140	119.5	41	1	4.23796	4.42828	1.74997	8.72	395	7.7835	3.67486	0	7.11131	0.0620633	3.72583	2.22752	1.30284	3.52361	8.06588	9.85345	82.0807	0.00170456	3.29645	0.000517091					0.105547	0.0219603	4.80628	7.57287	0.184704
20	NAS 1	51	NAS 1B	Haplic Kastanozem	Kastanozem	profile		5100	5	5105	2C'	C	C	190	165	50		4.69566	4.92758	1.73563	8.96	289	5.97109	1.8506	0	6.40158	0.0658804	2.43954	1.01187	1.54022	2.48625	9.12078	10.6195	80.2597	0.00195304	3.34096	0.000584575					0.0893885	0.0194497	4.59588	7.75729
20	NAS 1	51	NAS 1B	Haplic Kastanozem	Kastanozem	increment	w	5150	1	5151
20	NAS 1	51	NAS 1B	Haplic Kastanozem	Kastanozem	increment	x	5160	1	5161
20	NAS 1	51	NAS 1B	Haplic Kastanozem	Kastanozem	plant_shoot	p1	5190	1	5191																																40.1676	0.975067	41.1948			-26.3885
20	NAS 1	51	NAS 1B	Haplic Kastanozem	Kastanozem	plant_shoot	p2	5190	2	5192																																41.2154	1.28392	32.1013			-26.7826
20	NAS 1	51	NAS 1B	Haplic Kastanozem	Kastanozem	plant_root	p3	5190	3	5193																																39.9512	0.929398	42.9861			-28.2199
20	NAS 1	51	NAS 1B	Haplic Kastanozem	Kastanozem	plant_root	p4	5190	4	5194																																35.9174	0.908746	39.5241			-28.143
20	NAS 1	52	NAS 1C	Haplic Kastanozem	Kastanozem	profile		5200	1	5201	Ah1	A	Ah	16	8	16	16	2.79702	2.87807	1.49743	7.13	26	1.14485	0.0529056	0.0530095	0.333696	0.574969	0.148733	0.355342	0.210161	0	12.8293	27.1997	59.971	0.613082	5.21301	0.117606					0.971713	0.0956991	10.1856	23.2812	23.2812	-24.7683	0.569308	99.4307
20	NAS 1	52	NAS 1C	Haplic Kastanozem	Kastanozem	profile		5200	2	5202	Ah2	A	Ah	26	21	10	10	2.98057	3.07215	1.43177	7.17	21.8	1.05585	0.0153614	0.0459093	0.31878	0.225916	0.144412	0.358658	0.200968	0	12.261	25.1518	62.5872	0.589887	4.71746	0.125043					0.933556	0.0966453	9.71299	13.3663	13.3663	-24.6832	0.269099	99.7309
20	NAS 1	52	NAS 1C	Haplic Kastanozem	Kastanozem	profile		5200	3	5203	AC	AC	AC	46	36	20	20	4.01836	4.18688	1.4576	8.26	27.2	1.09055	0.0104145	0.0785864	0.637319	0.181807	0.233333	0.573079	0.317343	0	16.9091	28.4476	54.6433	0.482725	5.08917	0.0948532					0.569387	0.0683549	8.41292	16.5988	16.5988	-24.1998	0.140796	99.8592
20	NAS 1	52	NAS 1C	Haplic Kastanozem	Kastanozem	profile		5200	4	5204	C	C	C	71	58.5	25	25	2.40585	2.46547	1.59027	8.18	24	1.13131	0.033014	0.0939971	0.711901	0.275114	0.288142	0.689132	0.322003	0.117615	8.62519	9.24127	82.1335	0.135211	1.57525	0.0858346					0.251211	0.0301964	8.32024	9.9873	9.9873
20	NAS 1	52	NAS 1C	Haplic Kastanozem	Kastanozem	profile		5200	5	5205	Ck	C	Ck	98	84.5	27	27	3.21729	3.32559	1.61327	8.64	192.5	3.00776	1.48823	0.0501049	4.54303	0.153674	0.566959	2.39607	1.18023	6.60272	9.03452	11.8969	79.0685	0.0880204	2.85796	0.0307983					0.283375	0.0311832	9.08742	12.3433	12.3433
20	NAS 1	52	NAS 1C	Haplic Kastanozem	Kastanozem	profile		5200	6	5206	C'	C	C	111	104.5	13	2	2.69021	2.76524	1.71193	9.32	169.5	2.76305	0.843314	0.0746329	7.81455	0.143778	0.646101	1.34262	2.47773	2.65159	7.03491	10.3849	82.5802	0.097822	1.56452	0.0625254					0.116613	0.0325421	3.58347	2.59525	0.399269
20	NAS 1	52	NAS 1C	Haplic Kastanozem	Kastanozem	profile		5200	7	5207	C'k	C	Ck	125	118	14		4.08052	4.25521	1.64317	9.48	215	3.10183	0.9083	0.0832661	9.52321	0.0906208	0.868519	1.0786	3.05126	4.03938	10.6742	16.0783	73.2475	0.138288	3.70711	0.0373033					0.0951057			2.18784
20	NAS 1	52	NAS 1C	Haplic Kastanozem	Kastanozem	profile		5200	8	5208	C''	C	C	160	142.5	35		4.99571	5.25859	1.67493	9.65	201	2.1237	0.55754	0.1132	9.27613	0.0812901	0.971313	0.826322	3.09294	4.73859	11.349	20.1711	68.4799	0.146137	3.65978	0.0399307					0.0967939			5.67432
20	NAS 1	52	NAS 1C	Haplic Kastanozem	Kastanozem	increment	w	5250	1	5251
20	NAS 1	52	NAS 1C	Haplic Kastanozem	Kastanozem	increment	x	5260	1	5261
20	NAS 1	52	NAS 1C	Haplic Kastanozem	Kastanozem	plant_shoot	p1	5290	1	5291																																41.3968	1.35305	30.5951			-26.6118
20	NAS 1	52	NAS 1C	Haplic Kastanozem	Kastanozem	plant_root	p2	5290	2	5292																																39.4475	0.945036	41.7418			-27.3465
20	NAS 1	52	NAS 1C	Haplic Kastanozem	Kastanozem	plant_lichen	p3	5290	3	5293																																39.3949	0.792358	49.7186			-24.4242
21	NAS 2	53	NAS 2A	Mollic Solonchak	non-sodic Solonchak	profile		5300	1	5301	Az1	A	Az	10	5	10	10	20.2035	25.3892	1.24683	8.15	6820	155.19	133.514	0.0501856	200.443	2.80325	46.6101	78.3277	8.01792	4.83402				0.546539	5.42022	0.100833					1.92237	0.188915	10.1984	23.9687	23.9687	-22.8974	0.211193	99.7888
21	NAS 2	53	NAS 2A	Mollic Solonchak	non-sodic Solonchak	profile		5300	2	5302	Az2	A	Az	25	17.5	15	15	14.9213	17.541	1.53617	8.2	4830	94.1632	99.057	0.0513958	110.853	1.40925	32.7842	61.3363	5.10897	3.94804	17.8679	31.2438	50.8883	0.289085	3.86794	0.0747387					0.971501	0.10191	9.58415	22.3858	22.3858	-22.845	0.171315	99.8287
21	NAS 2	53	NAS 2A	Mollic Solonchak	non-sodic Solonchak	profile		5300	3	5303	B	B	B	55	40	30	30	14.0227	16.3203	1.55233	8.68	1780	47.01	15.6279	0	60.2766	0.357508	8.35125	4.26359	7.58608	4.19683	19.084	30.4706	50.4454	0.304776	4.86943	0.0625897					0.322017	0.0404336	8.08881	14.9963	14.9963	-22.8159	0.0992018	99.9008
21	NAS 2	53	NAS 2A	Mollic Solonchak	non-sodic Solonchak	profile		5300	4	5304	C	C	C	92	73.5	37	37	12.8108	14.6946	1.7217	8.66	1520	45.7038	9.59269	0.0158141	48.8479	0.230025	8.29552	3.57703	6.33679	11.9511	19.0531	30.9613	49.9856	0.135163	4.19563	0.0322151					0.17828	0.0295897	6.30038	11.3569	11.3569		0.0182937	99.9817
21	NAS 2	53	NAS 2A	Mollic Solonchak	non-sodic Solonchak	profile		5300	5	5305	Cl1	C	Cl	114	103	22	8	12.7693	14.6455	1.6857	8.55	1790	56.1615	11.1936	0	55.703	0.272981	10.4533	5.01042	6.33179	15.7336	20.2129	33.8773	45.9098	0.192327	4.34667	0.044247					0.157248	0.0312636	6.08329	5.8316	2.12058
21	NAS 2	53	NAS 2A	Mollic Solonchak	non-sodic Solonchak	profile		5300	6	5306	Cl2	C	Cl	154	134	40		13.6282	15.7786	1.7397	8.53	1650	50.6434	10.3346	0.0394546	51.3027	0.320095	9.47359	4.33604	6.17091	11.2086	20.4078	34.5286	45.0636	0.382526	4.24936	0.0900197					0.129815	0.0228939	6.16814	9.0336
21	NAS 2	53	NAS 2A	Mollic Solonchak	non-sodic Solonchak	profile		5300	7	5307	Cl3	C	Cl	160	157	6					8.5	1350	40.4518	8.52078	0.0143618	41.9196	0.232796	7.6803	3.86615	5.51444	9.05293	21.139	37.7482	41.1127	0.465794	5.31686	0.0876068					0.107329	0.0136554	7.85982	1.12052
21	NAS 2	53	NAS 2A	Mollic Solonchak	non-sodic Solonchak	increment	w	5350	1	5351
21	NAS 2	53	NAS 2A	Mollic Solonchak	non-sodic Solonchak	increment	x	5360	1	5361
21	NAS 2	53	NAS 2A	Mollic Solonchak	non-sodic Solonchak	increment	y	5370	1	5371
21	NAS 2	53	NAS 2A	Mollic Solonchak	non-sodic Solonchak	increment	z	5380	1	5381
21	NAS 2	53	NAS 2A	Mollic Solonchak	non-sodic Solonchak	plant_shoot	p1	5390	1	5391																																34.5819	1.49077	23.1974			-26.3865
21	NAS 2	53	NAS 2A	Mollic Solonchak	non-sodic Solonchak	plant_root	p2	5390	2	5392																																41.6971	0.61733	67.5443			-25.6425
21	NAS 2	54	NAS 2B	Mollic Solonchak	non-sodic Solonchak	profile		5400	1	5401	Az	A	Az	28	14	28	28	21.4817	27.3672	1.2383	8.2	6120	158.976	114.365	0.446587	119.876	1.78616	47.1439	87.6857	4.61603	3.89168				0.168476	0.886264	0.190097	107.51	0.24	88.57	0.21	1.29332	0.129035	10.0588	44.8426	44.8426	-22.5594	0.184937	99.8151
21	NAS 2	54	NAS 2B	Mollic Solonchak	non-sodic Solonchak	profile		5400	2	5402	A	A	Az	48	38	20	20	15.17	18.3501	1.5038	8.33	2900	86.7738	25.3961	0.0308214	85.3143	0.938806	19.909	11.0703	6.85176	4.90179	17.1173	37.7316	45.1512	0.288547	3.56509	0.0809367	91.67	0.21	81.72	0.2	0.981271	0.101916	9.7196	29.5127	29.5127	-23.1874	0.135952	99.864
21	NAS 2	54	NAS 2B	Mollic Solonchak	non-sodic Solonchak	profile		5400	3	5403	Bk	B	B	76	62	28	28	13.8427	16.0673	1.63013	8.58	2220	68.8434	15.385	0.0261417	75.278	0.521713	13.5874	6.01927	7.59914	7.68852	22.1389	32.495	45.366	0.222524	4.19807	0.0530062	93.86	0.22	85.79	0.22	0.277263	0.0379077	7.42902	12.6553	12.6553		0.0613561	99.9386
21	NAS 2	54	NAS 2B	Mollic Solonchak	non-sodic Solonchak	profile		5400	4	5404	C	C	C	108	92	32	24	12.5362	14.333	1.8663	8.64	1680	49.9755	11.5734	0.0207358	57.362	0.215475	8.78592	3.95349	7.1837	16.0512	20.3984	33.8212	45.7803	0.0523162	4.00397	0.0130661			60.24	0.19	0.186681	0.0271406	7.14205	11.1489	8.36167		0.0284648	99.9715
21	NAS 2	54	NAS 2B	Mollic Solonchak	non-sodic Solonchak	profile		5400	5	5405	Cl1	C	Cl	125	116.5	17		12.5133	14.3052	1.8418	8.6	1720	50.6128	12.2459	0.255123	56.8573	0.147576	8.79595	4.00495	7.1034	16.3491	20.9253	40.2214	38.8533	0.170815	3.04027	0.0561839					0.14818	0.0382108	3.87797	4.63962
21	NAS 2	54	NAS 2B	Mollic Solonchak	non-sodic Solonchak	profile		5400	6	5406	Cl2	C	Cl	146	135.5	21		11.6629	13.2202	1.82597	8.66	1290	36.0698	9.4862	0.026303	46.7067	0.124019	6.21468	2.86203	6.92972	16.8759	19.6938	35.4904	44.8157	0.219993	3.98447	0.0552127					0.137883	0.0235868	6.47821	5.28716
21	NAS 2	54	NAS 2B	Mollic Solonchak	non-sodic Solonchak	profile		5400	7	5407	2Cl3	C	Cl	190	168	44		15.3565	18.1456	1.75413	8.61	510	12.5309	3.57597	0	15.1452	0.0720559	2.90449	1.76854	3.13185	0.687873	8.07394	11.2707	80.6553	0.386906	3.65616	0.105823								5.40273
21	NAS 2	54	NAS 2B	Mollic Solonchak	non-sodic Solonchak	increment	w	5450	1	5451
21	NAS 2	54	NAS 2B	Mollic Solonchak	non-sodic Solonchak	increment	x	5460	1	5461
21	NAS 2	54	NAS 2B	Mollic Solonchak	non-sodic Solonchak	increment	y	5470	1	5471
21	NAS 2	54	NAS 2B	Mollic Solonchak	non-sodic Solonchak	increment	z	5480	1	5481
21	NAS 2	54	NAS 2B	Mollic Solonchak	non-sodic Solonchak	plant_shoot	p1	5490	1	5491																																37.4558	1.19511	31.3409			-25.7454
21	NAS 2	54	NAS 2B	Mollic Solonchak	non-sodic Solonchak	plant_root	p2	5490	2	5492																																42.3932	0.757887	55.936			-26.3068
21	NAS 2	55	NAS 2C	Mollic Solonchak	non-sodic Solonchak	profile		5500	1	5501	Az	A	Az	19	9.5	19	19	13.1455	15.1365	1.60537	8.65	1930	51.8293	14.6147	0.370663	81.4068	0.904163	4.51835	1.39344	14.9648	2.86488	13.9676	29.6573	56.375	0.381969	3.17499	0.120306					2.0489	0.206499	9.95197	62.4956	62.4956	-24.1956	0.282231	99.7178
21	NAS 2	55	NAS 2C	Mollic Solonchak	non-sodic Solonchak	profile		5500	2	5502	Bk	B	B	48	33.5	29	29	14.536	17.0464	1.5772	8.85	850	16.2217	7.8242	0.107633	30.9861	0.158662	3.24554	1.82339	6.15214	11.4079	18.1728	26.03	55.7972	0.000579616	2.77371	0.000208968					0.472303	0.0615329	7.9418	21.6026	21.6026	-23.7943	0.0909035	99.9091
21	NAS 2	55	NAS 2C	Mollic Solonchak	non-sodic Solonchak	profile		5500	3	5503	Ck	C	C	88	68	40	40	11.4296	12.9095	1.72737	8.94	390	5.60127	3.25406	0.073584	10.5645	0.232103	1.3263	0.838906	3.20943	14.4445	17.4574	29.2982	53.2444	0.000878718	3.8697	0.000227076					0.193923	0.0312238	6.6817	13.3991	13.3991	-23.6222	0.052405	99.9476
21	NAS 2	55	NAS 2C	Mollic Solonchak	non-sodic Solonchak	profile		5500	4	5504	2C	C	C	122	105	34	12	8.36912	9.14757	1.74087	9.07	200	3.80578	1.12419	0.0639019	12.8519	0.0983841	1.0042	0.841615	4.2289	1.32659	7.94084	4.91576	87.1434	0.00172167	3.19256	0.000539276					0.0730674	0.0222154	3.28904	4.32482	1.52641
21	NAS 2	55	NAS 2C	Mollic Solonchak	non-sodic Solonchak	profile		5500	5	5505	2Cl1	C	Cl	170	146	48		11.3118	12.7787	1.7227	8.82	350	7.52257	2.55108	0	9.89243	0.0235567	1.75652	1.2025	2.57078	0.717464	6.71858	2.93938	90.342	0.00212676	2.72809	0.000779577					0.0692205	0.0184237	3.75714	5.72381
21	NAS 2	55	NAS 2C	Mollic Solonchak	non-sodic Solonchak	profile		5500	6	5506	2Cl2	C	Cl	190	180	20		19.6902	25.1197	1.68503	9.03	220	3.86601	1.4976	0.0775375	7.39279	0.137876	1.04098	0.74276	2.47447	1.79715	8.10907	2.99867	88.8923	0.00265393	3.11632	0.000851623								2.35905
21	NAS 2	55	NAS 2C	Mollic Solonchak	non-sodic Solonchak	increment	w	5550	1	5551
21	NAS 2	55	NAS 2C	Mollic Solonchak	non-sodic Solonchak	increment	x	5560	1	5561
21	NAS 2	55	NAS 2C	Mollic Solonchak	non-sodic Solonchak	increment	y	5570	1	5571
21	NAS 2	55	NAS 2C	Mollic Solonchak	non-sodic Solonchak	increment	z	5580	1	5581
21	NAS 2	55	NAS 2C	Mollic Solonchak	non-sodic Solonchak	plant_shoot	p1	5590	1	5591																																38.7275	1.73371	22.338			-27.3306
21	NAS 2	55	NAS 2C	Mollic Solonchak	non-sodic Solonchak	plant_root	p2	5590	2	5592																																42.484	0.949423	44.7472			-27.185
21	NAS 2	55	NAS 2C	Mollic Solonchak	non-sodic Solonchak	plant_root	p3	5590	3	5593																																43.7864	0.813857	53.8012			-26.6284
22	NAS 3	56	NAS 3A	Gleyic Sodic Solonchak	Sodic Solonchak	profile		5600	1	5601	Az	A	Az	21	10.5	21	21	21.1884	26.9197	1.29753	8.78	7760	82.9267	170.095	1.16605	416.201	4.21458	9.98405	3.34547	50.9534	23.8596	28.9845	16.1406	54.8749	0.0078847	0.476743	0.0165387	105.86	0.27	98.49	0.44	2.17937	0.217406	10.0244	59.3838	59.3838	-24.165	0.457404	99.5426
22	NAS 3	56	NAS 3A	Gleyic Sodic Solonchak	Sodic Solonchak	profile		5600	2	5602	AC	AC	ACz	39	30	18	18	21.6125	27.5819	1.2417	8.82	5890	96.0492	106.664	0.112716	301.171	2.57531	11.326	7.30844	31.1878	24.8256	30.3804	23.8168	45.8028	0.00959303	0.744761	0.0128807	103.44	0.22	82.32	0.2	0.642111	0.0636804	10.1494	14.3516	14.3516	-23.2466	0.159739	99.8403
22	NAS 3	56	NAS 3A	Gleyic Sodic Solonchak	Sodic Solonchak	profile		5600	3	5603	Cl1	C	Cl	66	52.5	27	27	12.0766	13.7355	1.7882	8.86	3380	77.2312	41.4537	0.0546232	150.132	1.49724	9.67867	4.22297	17.9985	8.96426	19.8937	24.5661	55.5402	1.34337	2.76716	0.485468	98.52	0.24	87.6	0.23	0.164251	0.0264874	6.74517	7.93028	7.93028		0.279227	99.7208
22	NAS 3	56	NAS 3A	Gleyic Sodic Solonchak	Sodic Solonchak	profile		5600	4	5604	Cl2	C	Cl	85	75.5	19	19	12.2136	13.9166	1.8027	9.11	2520	50.2484	32.3306	0.0363079	111.682	0.493999	4.77358	2.6562	18.3152	17.1767	20.7057	21.1394	58.1549	0.0521248	3.08826	0.0168784					0.134052	0.0232044	6.42775	4.59147	4.59147
22	NAS 3	56	NAS 3A	Gleyic Sodic Solonchak	Sodic Solonchak	profile		5600	5	5605	Cl3	C	Cl	109	97	24	15	11.6574	13.1984	1.84103	9.13	2170	42.9258	28.7289	0.0263837	99.3016	0.392843	4.47377	2.34812	16.9948	10.5878	15.3485	19.6405	65.011	0.1906	3.92054	0.0486158					0.0895699	0.0209842	4.26845	3.95763	2.47352
22	NAS 3	56	NAS 3A	Gleyic Sodic Solonchak	Sodic Solonchak	profile		5600	6	5606	Cl4	C	Cl	140	124.5	31		14.8675	17.4666	1.79753	8.72	1900	41.0917	22.7917	0.0200097	82.9597	0.222403	5.18707	1.42187	14.4233	0.0350034	14.3952	13.0983	72.5066	0.493127	3.91192	0.126058								3.90065
22	NAS 3	56	NAS 3A	Gleyic Sodic Solonchak	Sodic Solonchak	increment	w	5650	1	5651
22	NAS 3	56	NAS 3A	Gleyic Sodic Solonchak	Sodic Solonchak	increment	x	5660	1	5661
22	NAS 3	56	NAS 3A	Gleyic Sodic Solonchak	Sodic Solonchak	increment	y	5670	1	5671
22	NAS 3	56	NAS 3A	Gleyic Sodic Solonchak	Sodic Solonchak	increment	z	5680	1	5681
22	NAS 3	56	NAS 3A	Gleyic Sodic Solonchak	Sodic Solonchak	plant_shoot	p1	5690	1	5691																																37.5049	1.49192	25.1387			-25.0806
22	NAS 3	56	NAS 3A	Gleyic Sodic Solonchak	Sodic Solonchak	plant_shoot	p2	5690	2	5692																																37.6173	1.40594	26.7559			-26.4963
22	NAS 3	56	NAS 3A	Gleyic Sodic Solonchak	Sodic Solonchak	plant_shoot	p3	5690	3	5693																																37.4759	1.6826	22.2727			-26.988
22	NAS 3	56	NAS 3A	Gleyic Sodic Solonchak	Sodic Solonchak	plant_root	p4	5690	4	5694																																40.2146	0.683779	58.8123			-25.8461
22	NAS 3	57	NAS 3AII	Sodic Solonchak	Sodic Solonchak	profile		5700	1	5701	Az	A	Az	25	12.5	25	25	27.914	38.725	1.17917	8.7	5620	76.3743	92.2052	0.348394	268.938	2.06351	7.53429	1.08854	40.9314	21.8483	18.6156	44.0914	37.293	0.0120837	1.124	0.0107506					2.92467	0.304167	9.61536	86.217	86.217	-23.0766	0.339557	99.6604
22	NAS 3	57	NAS 3AII	Sodic Solonchak	Sodic Solonchak	profile		5700	2	5702	AC	AC	ACz	60	42.5	35	35	25.9199	35.0327	1.22067	8.85	5010	113.795	60.9763	0.0739874	234.327	0.12727	7.70508	1.9026	33.7886	30.6109	22.2271	39.2174	38.5555	0.00492887	0.179	0.0275356					1.60283	0.163843	9.78275	68.4784	68.4784	-23.4433	0.119367	99.8806
22	NAS 3	57	NAS 3AII	Sodic Solonchak	Sodic Solonchak	profile		5700	3	5703	C	C	C	84	72	24	24	19.6078	24.3952	1.53783	9.13	1550	32.3262	14.0134	0.0476844	69.5538	0.223523	1.38649	0.728542	21.3784	22.977	22.4199	35.5081	42.0719	0.0189343	2.352	0.00805029					0.44607	0.0484894	9.19934	16.4635	16.4635		0.0541834	99.9458
22	NAS 3	57	NAS 3AII	Sodic Solonchak	Sodic Solonchak	profile		5700	4	5704	Cl1	C	Cl	132	108	48	16	15.2081	17.9697	1.77417	8.9	610	8.75289	6.3368	0	22.6513	0.236633	1.76372	1.02906	6.05892	21.1339	20.0779	33.4438	46.4783	0.0762042	2.922	0.0260795					0.198983	0.0251961	7.89736	16.9454	5.64847
22	NAS 3	57	NAS 3AII	Sodic Solonchak	Sodic Solonchak	profile		5700	5	5705	Cl2	C	Cl	170	151	38
22	NAS 3	57	NAS 3AII	Sodic Solonchak	Sodic Solonchak	increment	x	5750	1	5751
22	NAS 3	57	NAS 3AII	Sodic Solonchak	Sodic Solonchak	increment	y	5760	1	5761
22	NAS 3	57	NAS 3AII	Sodic Solonchak	Sodic Solonchak	increment	z	5770	1	5771
22	NAS 3	57	NAS 3AII	Sodic Solonchak	Sodic Solonchak	plant_shoot	p1	5790	1	5791																																37.9304	2.05806	18.4302			-28.2742
22	NAS 3	57	NAS 3AII	Sodic Solonchak	Sodic Solonchak	plant_root	p1	5790	2	5792																																40.4128	0.512772	78.8124			-25.7261
22	NAS 3	58	NAS 3AIII	Haplic Solonchak	non-sodic Solonchak	profile		5800	1	5801	Az	A	Az	17	8.5	17	17	18.5153	22.7307	1.35633	9	1330	20.8228	14.1111	0.0946426	56.2538	2.37529	3.80796	0.947083	11.5301	9.89933	20.7241	33.1553	46.1207	0.250995	1.482	0.169362					2.38966	0.251396	9.50555	55.1	55.1	-24.7113	0.623438	99.3766
22	NAS 3	58	NAS 3AIII	Haplic Solonchak	non-sodic Solonchak	profile		5800	2	5802	AB	B	B	41	29	24	24	19.4082	24.1295	1.39233	9.17	1010	15.4219	9.6144	0.0485719	44.2131	0.985866	2.53018	0.712187	10.9745	21.2416	24.457	35.9319	39.6111	0.00936986	2.276	0.00411681					0.83399	0.0914848	9.11616	27.8686	27.8686	-23.8055	0.0694517	99.9305
22	NAS 3	58	NAS 3AIII	Haplic Solonchak	non-sodic Solonchak	profile		5800	3	5803	B	B	B	69	55	28	28	16.629	20.0021	1.66767	9.03	360	3.50987	2.53463	0	12.4227	0.607252	2.05213	0.894167	3.23501	13.9948	22.1962	36.062	41.7418	0.0574927	3.31	0.0173694					0.29505	0.0464979	6.34545	13.7773	13.7773		0.10828	99.8917
22	NAS 3	58	NAS 3AIII	Haplic Solonchak	non-sodic Solonchak	profile		5800	4	5804	C	C	C	107	88	38	31	16.1776	19.3043	1.78283	8.76	560	6.43188	6.47641	0	18.3321	0.257099	2.45473	1.5425	4.09882	24.1915	28.5041	45.2103	26.2856	0.0868519	3.019	0.0287684					0.192312	0.0338562	5.68028	13.0287	10.6287		0.00607153	99.9939
22	NAS 3	58	NAS 3AIII	Haplic Solonchak	non-sodic Solonchak	profile		5800	5	5805	Cl1	C	Cl	127	117	20		11.8471	13.4446	1.97183	9.05	180	1.1708	1.16778	0	4.69798	0.370619	1.39883	0.955729	1.36864	9.53858	12.2805	14.9627	72.7568	0.182087	3.007	0.0605544					0.0728943	0.0174577	4.17548	2.87471
22	NAS 3	58	NAS 3AIII	Haplic Solonchak	non-sodic Solonchak	profile		5800	6	5806	Cl2	C	Cl	160	143.5	33		17.2198	20.8019	1.74733	8.71	280	2.01763	2.30254	0	8.45342	0.263494	1.50926	1.10552	2.33699	12.2498	27.3067	53.6303	19.0631	0.402725	5.786	0.0696034					0.102576	0.0312966	3.27755	5.91474
22	NAS 3	58	NAS 3AIII	Haplic Solonchak	non-sodic Solonchak	increment	x	5850	1	5851
22	NAS 3	58	NAS 3AIII	Haplic Solonchak	non-sodic Solonchak	increment	y	5860	1	5861
22	NAS 3	58	NAS 3AIII	Haplic Solonchak	non-sodic Solonchak	increment	z	5870	1	5871
22	NAS 3	58	NAS 3AIII	Haplic Solonchak	non-sodic Solonchak	plant_root	p1	5890	1	5891																																40.8525	0.608422	67.1451			-27.526
22	NAS 3	59	NAS 3AIV	Sodic Solonchak	Sodic Solonchak	profile		5900	1	5901	Az	A	Az	20	10	20	20	20.7758	26.2266	1.206	8.6	2670	44.1494	35.7092	0.189608	110.891	2.22563	8.19616	1.39479	16.0031	16.4186	10.1235	32.1066	57.7699	0.0520533	1.316	0.0395542					2.26161	0.23906	9.46041	54.5501	54.5501	-23.5886	0.550193	99.4498
22	NAS 3	59	NAS 3AIV	Sodic Solonchak	Sodic Solonchak	profile		5900	2	5902	AC	AC	ACz	51	35.5	31	31	19.9789	24.971	1.41817	8.83	740	11.9937	6.672	0.0467162	28.8659	0.11416	2.66255	1.33688	6.452	23.6425	16.3079	29.0007	54.6913	0.01172	1.832	0.00639735					1.07675	0.107423	10.0234	47.3372	47.3372	-23.655	0.0637993	99.9362
22	NAS 3	59	NAS 3AIV	Sodic Solonchak	Sodic Solonchak	profile		5900	3	5903	C1	C	C	77	64	26	26	14.411	16.8452	1.72617	8.89	340	2.98223	3.50089	0	10.2052	0.155091	2.0727	1.53562	2.40165	18.5328	16.4291	26.6578	56.913	0.0182004	2.884	0.00631083					0.335146	0.0368299	9.09985	15.0415	15.0415		0.0496641	99.9503
22	NAS 3	59	NAS 3AIV	Sodic Solonchak	Sodic Solonchak	profile		5900	4	5904	C2	C	C	105	91	28	23	12.5038	14.291	1.79733	9.01	210	1.39605	1.80275	0.0345328	6.37652	0.428083	1.67908	1.1695	1.68891	20.4433	14.8705	25.3899	59.7396	0.0568072	2.952	0.0192436					0.145187	0.0188142	7.71688	7.30656	6.00182		0.00598014	99.994
22	NAS 3	59	NAS 3AIV	Sodic Solonchak	Sodic Solonchak	profile		5900	5	5905	Cl1	C	Cl	126	115.5	21		11.925	13.5406	1.849	9.06	170	1.13949	1.13117	0	6.28798	0.702897	3.74753	1.19507	1.26417	8.51129	11.1338	16.9221	71.9442	0.169946	2.703	0.0628732					0.0806371	0.0257036	3.13719	3.13106
22	NAS 3	59	NAS 3AIV	Sodic Solonchak	Sodic Solonchak	profile		5900	6	5906	Cl2	C	Cl	150	138	24		15.783	18.7443	1.70667	8.88	210	1.35444	1.44433	0	6.62549	0.469749	3.65158	0.892083	1.38922	2.16621	13.5699	27.1039	59.3262	0.472558	4.461	0.105931					0.071179	0.0128295	5.54808	2.91549
22	NAS 3	59	NAS 3AIV	Sodic Solonchak	Sodic Solonchak	increment	x	5950	1	5951
22	NAS 3	59	NAS 3AIV	Sodic Solonchak	Sodic Solonchak	increment	y	5960	1	5961
22	NAS 3	59	NAS 3AIV	Sodic Solonchak	Sodic Solonchak	increment	z	5970	1	5971
22	NAS 3	59	NAS 3AIV	Sodic Solonchak	Sodic Solonchak	plant_root	p1	5990	1	5991																																40.4364	1.06171	38.0861			-24.4561
[truncated: 59 more columns]

## Sheet: abbreviation
	Abbreviations
	Soil_type	Soil type according to WRB 2014 (Table S1)
	Soil_type2	Soil type used for classification in the paper
	Hor	Horizon
	Hor_sub …	Horizon subclass
	L_Edge	Lower edge of horizon
	Hor_depth_center	Center depth of horizon
	Depth_1m	Depth of horizons till 1m depth is reached
	Moist	Moisture
	EC	Electrical Conductivity
	BD	Bulk Density
	Feoxal	Oxalate-extractable Fe
	Fedith	Dithionite-extractable Fe
	C14_POM	14C activity of POM
	C14_err_POM	Measurement error of 14C activity of POM
	C14_MOM	14C activity of MOM
	C14_err_MOM	Measurement error of 14C activity of MOM
	OC	Organic carbon
	TN	Total nitrogen
	SOC_stock	SOC stock per sample
	SOC_stock_1m	SOC stock per sample till 1m depth (not cumulative)
	POM	Particulate organic matter
	MOM_calc	Mineral-associated organic matter, calculated as: MOM_calc = 100% - POM (% of bulk soil), this includes losses occuring during the laboratory method,
		assuming all losses derive from the MOM pool (this is more or less valid, as DOC measurements showed most of the lost DOC derived from MOM, and only minor losses derive from POM, furthermore MOM was partly lost by decanting)
	MOM_meas	Mineral-associated organic matter, % of mass per bulk soil measured during density fractionation, but excluding losses during the method procedure
	DF_losses	Losses, occuring during density fractionation
	POC	Particulate organic carbon
	MOC	Mineral-associated organic carbon
	DOC	Dissolved organic carbon --> measured as NPOC in the washing solution of each density-fraction and referred to in the paper as mobilized OC (MobC)
	Aggstab	Aggregate stability
